# Supplementary material for: A facile dopamine-mediated metal-catecholamine coating for therapeutic nitric oxide gas interface-catalytic engineering of vascular devices
Source: Royal Society of Chemistry journal article supplement (doi:10.1039/c9bm00017h), 2019-01-01
Supplement: c9bm00017h1.pdf [file c9bm00017h1.pdf]

## Supporting Information for

# A facile dopamine-mediated metal-catecholamine coating for therapeutic nitric oxide gas interface-catalytic engineering of vascular devices

Qiang Song,<sup>a</sup> Long Li,<sup>b</sup> Kaiqin Xiong,<sup>a</sup> Wenjie Tian,<sup>c</sup> Jing Lu,<sup>d</sup> Jin Wang,<sup>a</sup> Nan Huang,<sup>\*,a</sup> Qiufen Tu,<sup>\*,a</sup> and Zhilu Yang<sup>a</sup>

<sup>a</sup>Key Lab. of Advanced Technology for Materials of Education Ministry, School of Materials Science and Engineering, Southwest Jiaotong University, Chengdu, 610031, China.

<sup>b</sup>Institute of Environmental Engineering Technology, China Institute for Radiation Protection, Taiyuan, 030006, China.

<sup>c</sup>Cardiology Department, Sichuan Provincial People's Hospital & Sichuan Academy of Medical Sciences, Chengdu, Sichuan 610072, China.

<sup>d</sup>Anesthesiology Department, Sichuan Provincial People's Hospital & Sichuan Academy of Medical Sciences, Chengdu, Sichuan 610072, China.

*E-mail addresses:* huangnan1956@163.com; tuqiufen@swjtu.edu.cn

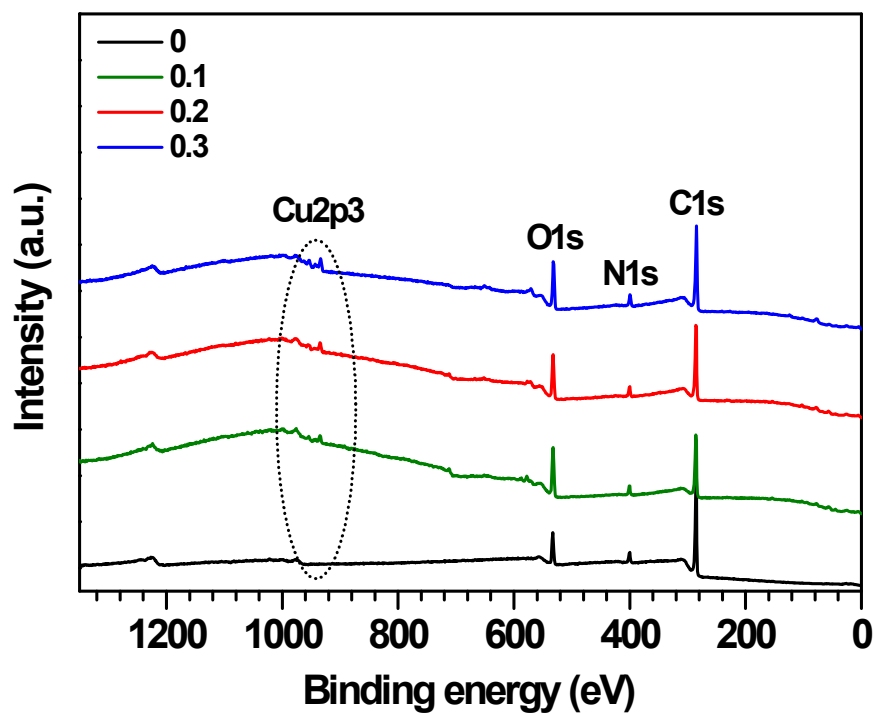

**Fig. S1** XPS spectra of the Cu<sup>II</sup>-DA coatings, which were prepared with different feeding concentrations of CuCl<sub>2</sub>·2H<sub>2</sub>O (0, 0.1, 0.2, and 0.3 mg/mL).

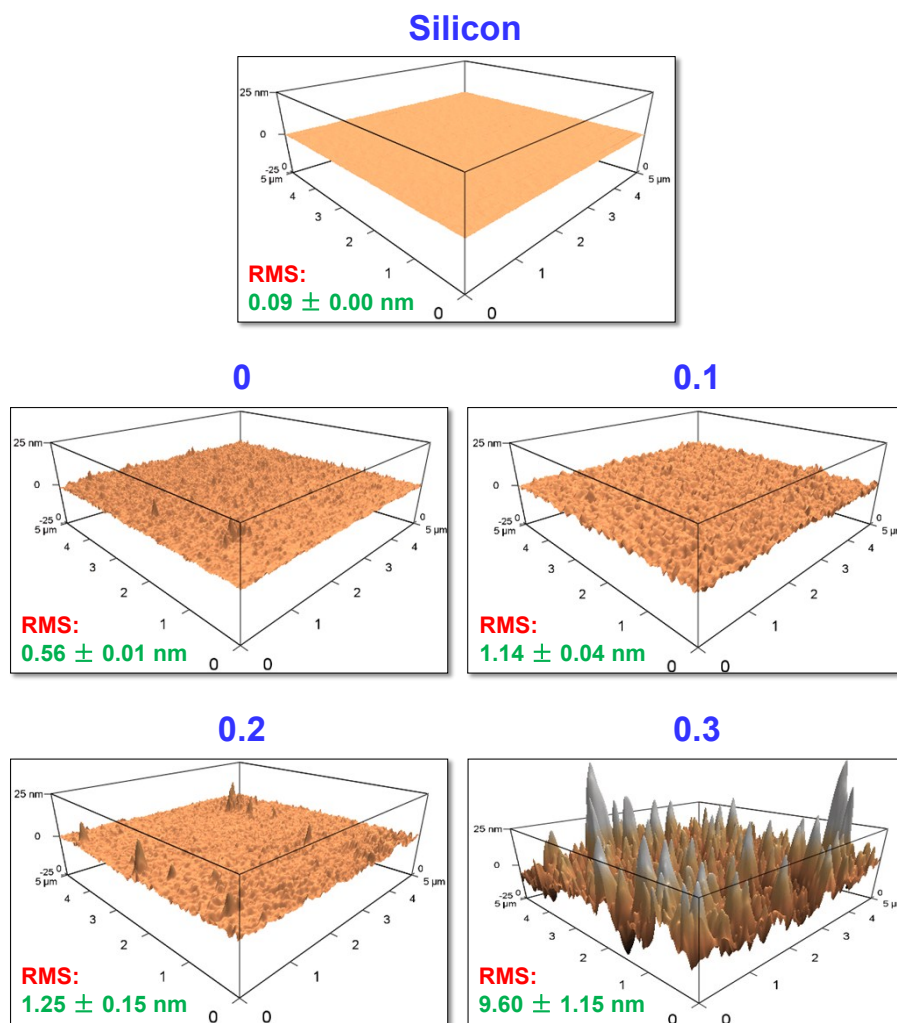

**Fig. S2** Representative AFM images of silicon substrates modified with Cu<sup>II</sup>-DA coatings, which were prepared with different feeding concentrations of CuCl<sub>2</sub>·2H<sub>2</sub>O (0, 0.1, 0.2, and 0.3 mg/mL).

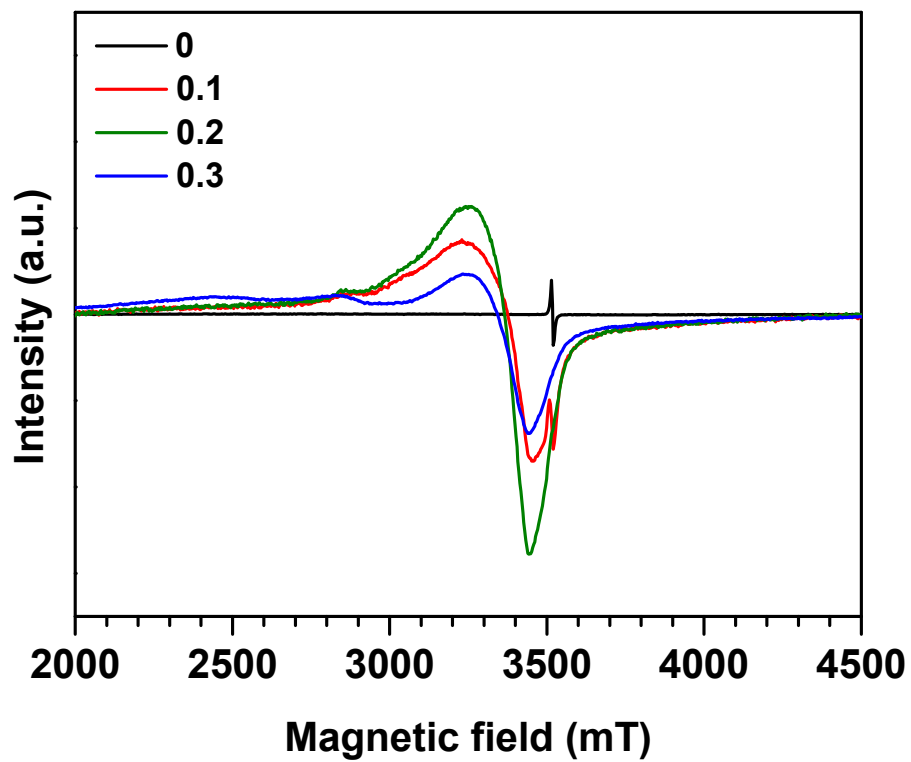

**Fig. S3** EPR spectra of the  $\text{Cu}^{\text{II}}$ -DA coatings, which were prepared with different feeding concentrations of  $\text{CuCl}_2 \cdot 2\text{H}_2\text{O}$  (0, 0.1, 0.2, and 0.3 mg/mL).

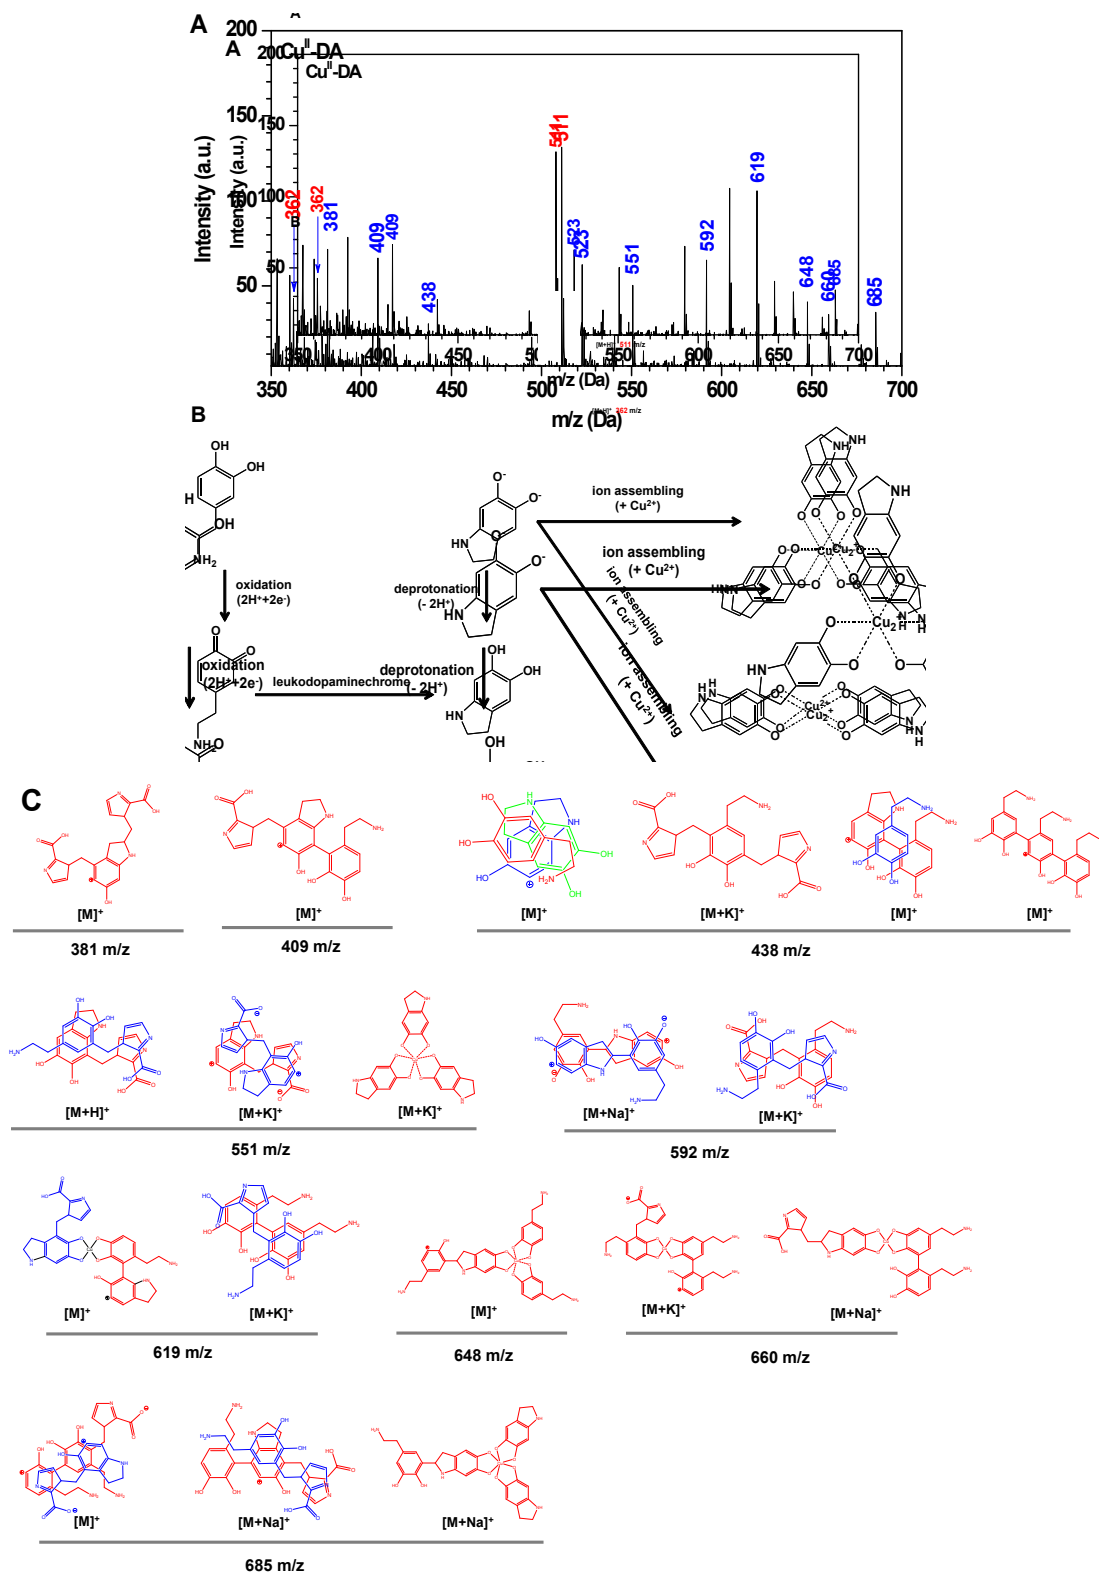

**Fig. S4** (A) MALDI MS analysis of the  $\text{Cu}^{\text{II}}$ -DAcoating. (B) Possible chemical reactions between  $\text{Cu}^{\text{II}}$  and DA with a tetradentate and hexadentate chelating model. (C) Possible chemical structure assigned to some other obvious peaks.

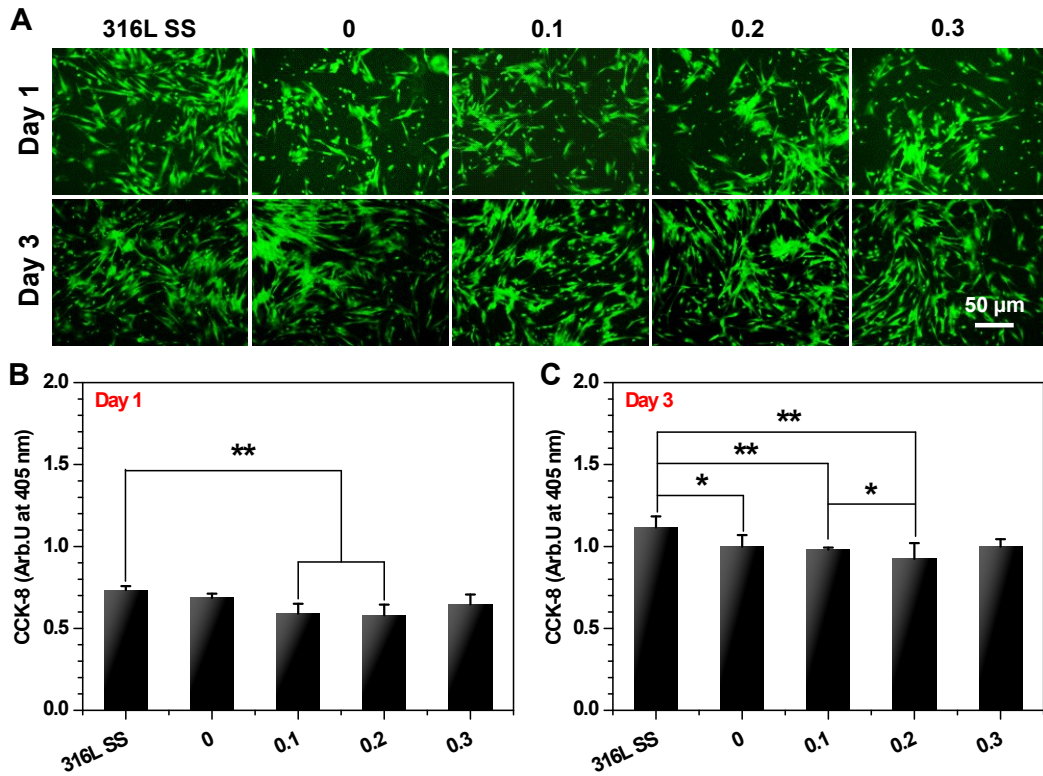

**Fig. S5** Growth of HUASMCs cultured on different samples. (A) Fluorescence staining of HUASMCs incubated in cell culture media without NO donor for 1 and 3 days, respectively. (B) and (C) Growth analysis of HUASMCs using CCK-8. Data are presented as mean  $\pm$  SD and analyzed by one-way ANOVA ( $n = 4$ ,  $*p < 0.05$ , and  $**p < 0.01$ ).

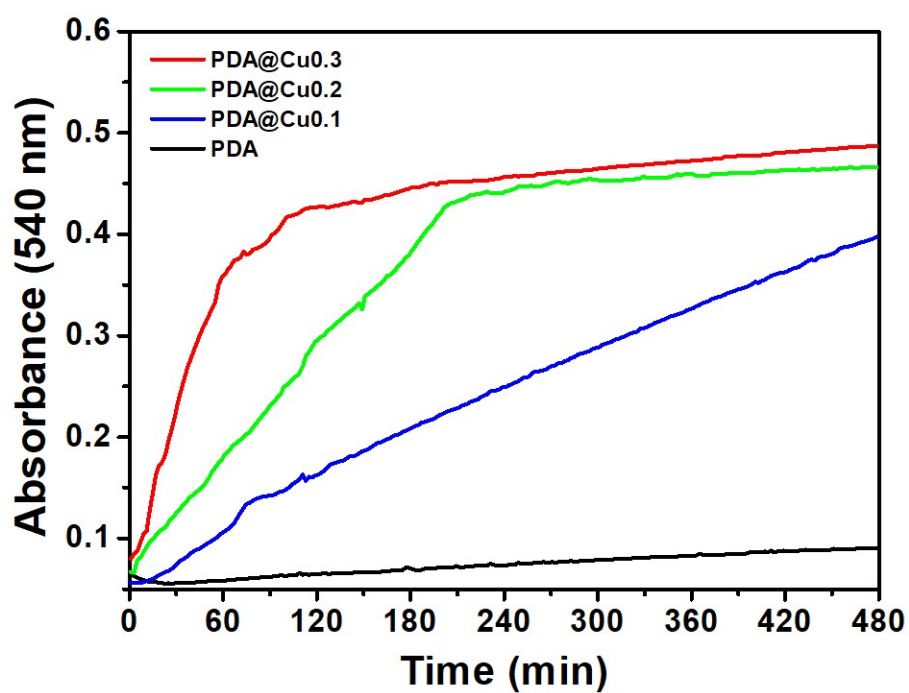

**Fig. S6** Real-time catalytic release curve of the Cu<sup>II</sup>-DA coatings (deposited on 24 well cell culture plates) with different feeding concentrations of CuCl<sub>2</sub>·2H<sub>2</sub>O (0, 0.1, 0.2, and 0.3 mg/mL). Each well was supplemented with 1 mL NO donor solution (10 μM GSNO and 10 μM GSH), the release of NO was reflected via OD value detected by enzyme labeling instrument by using Griess reagent.

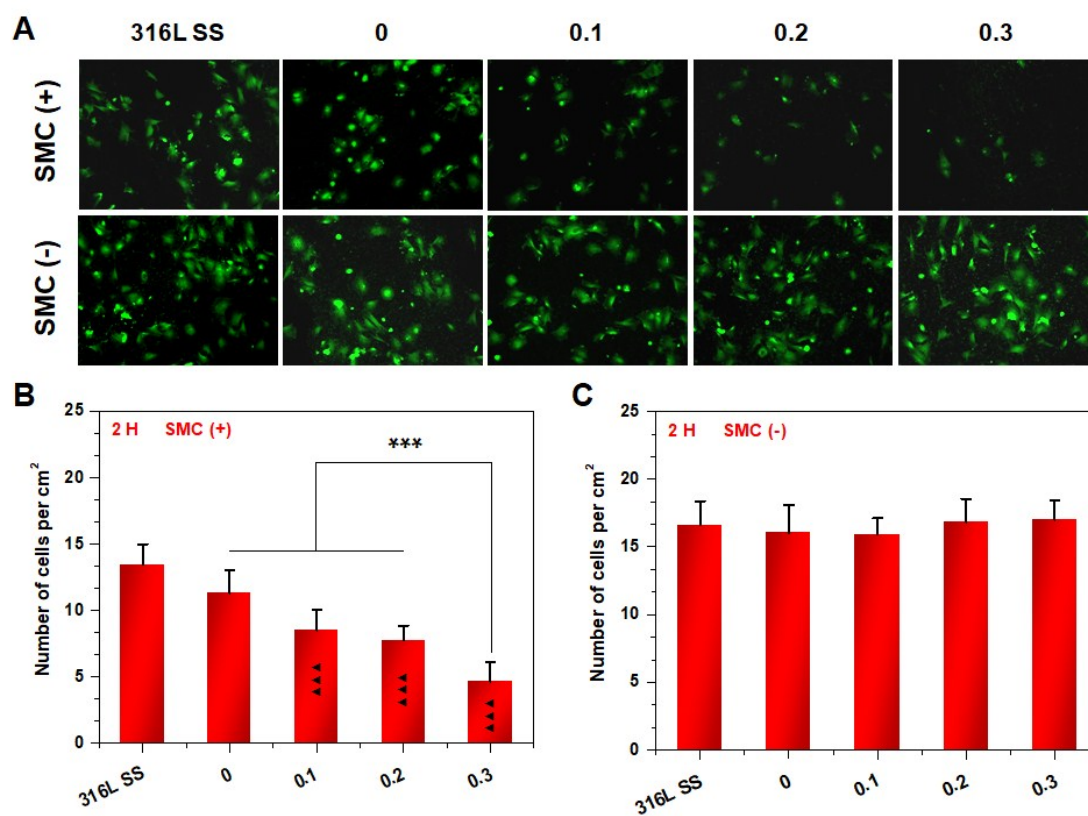

**Fig. S7** Adhesion of HUASMCs on different samples after 2 h of culture in the presence and absence of NO donor. (A) Fluorescent images and (B, C) cell count and statistical analysis. Data are presented as mean  $\pm$  SD and analyzed by one-way ANOVA ( $n = 4$ ,  $***p < 0.001$ ,  $\blacktriangledown\blacktriangledown\blacktriangledown p < 0.001$  compared with 316L SS samples).



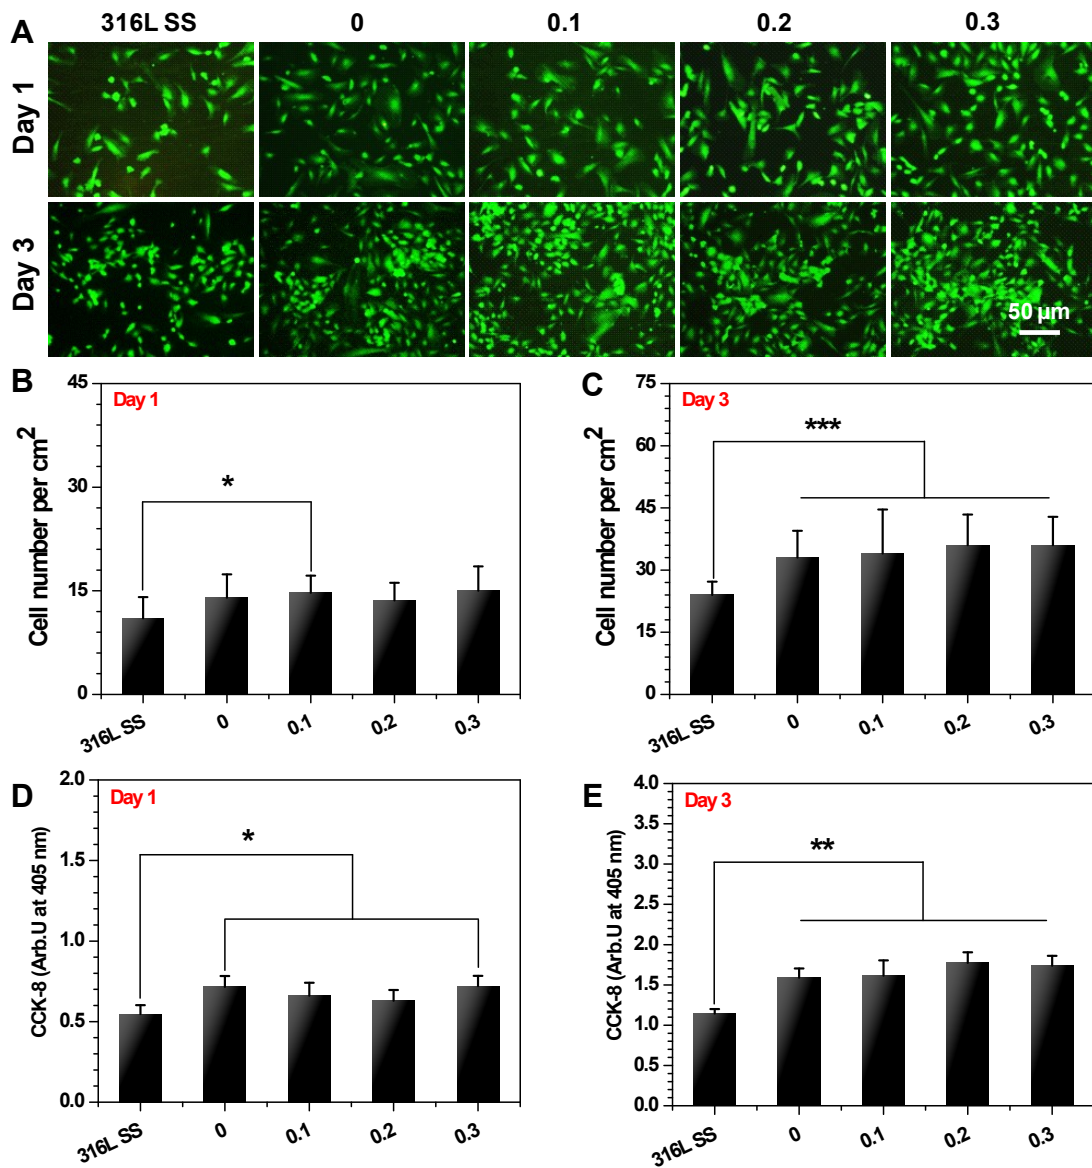

**Fig. S8** Growth of HUVECs cultured on different samples. Fluorescence staining of HUVECs incubated in cell culture media without NO donor for 1 and 3 days, respectively (A). Number of HUVECs per cm<sup>2</sup> from fluorescence images (B, C). Growth analysis of HUVECs using CCK-8 (D, E). Data are presented as mean  $\pm$  SD and analyzed by one-way ANOVA ( $n = 4$ , \* $p < 0.05$ , and \*\* $p < 0.01$ ).

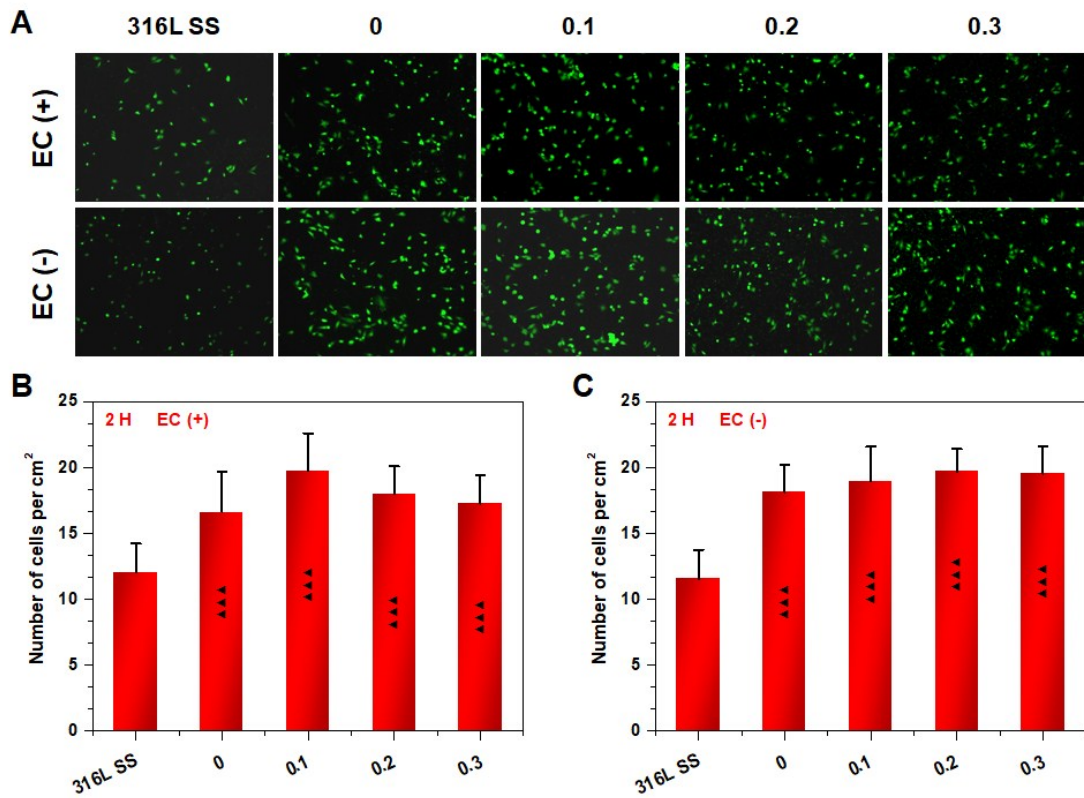

**Fig. S9** Adhesion of HUVECs on different samples after 2 h of culture in the presence and absence of NO donor. (A) Fluorescent images and (B, C) cell count and statistical analysis. Data are presented as mean  $\pm$  SD and analyzed by one-way ANOVA ( $n = 4$ ,  $\blacktriangledown\blacktriangledown\blacktriangledown p < 0.001$  compared with 316L SS samples).

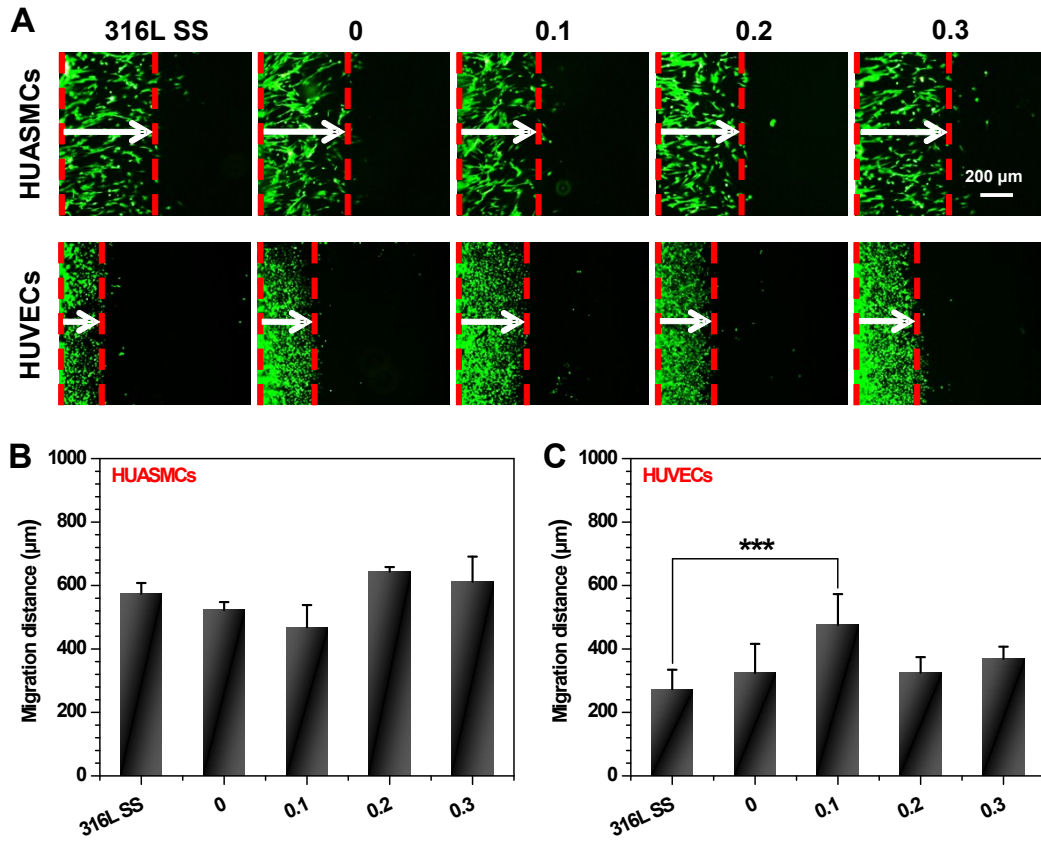

**Fig. S10** Vascular cell migration. (A) Rhodamine staining of HUASMCs (top) and HUVECs (bottom) on different surfaces after culture in media without NO donor for 1 day. (A). Migration distance of HUASMCs (B) and HUVECs (C). Data are presented as mean  $\pm$  SD (n=12) and analyzed by one-way ANOVA (\*\*\*)  $p < 0.001$ .

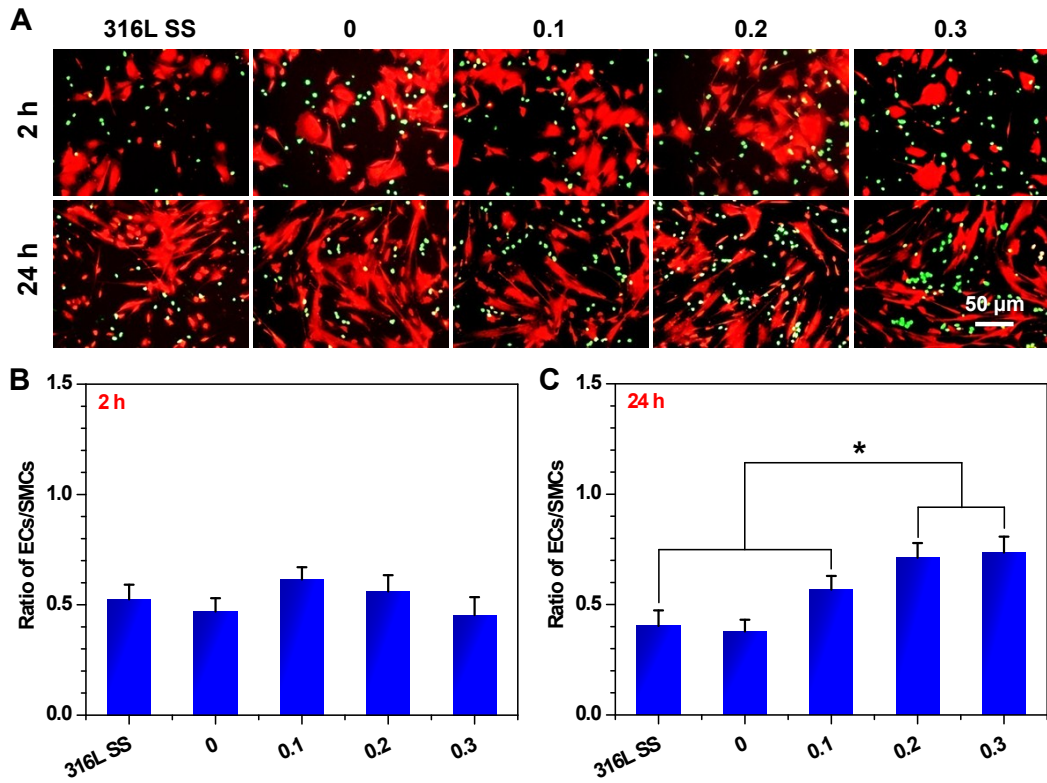

**Fig. S11** Competitive adhesion and growth between HUASMCs and HUVECs on different samples after 2 and 24 h of culture in media without NO donor. (A) Fluorescence staining of HUASMCs using CMTMR (red) and HUVECs using CMFDA (green) grown on different surfaces. The ratio of HUVECs/HUASMCs on different surfaces for 2 h (B) and 24 h (C). Data are presented as mean  $\pm$  SD and analyzed by one-way ANOVA (n = 8, \*p < 0.05).

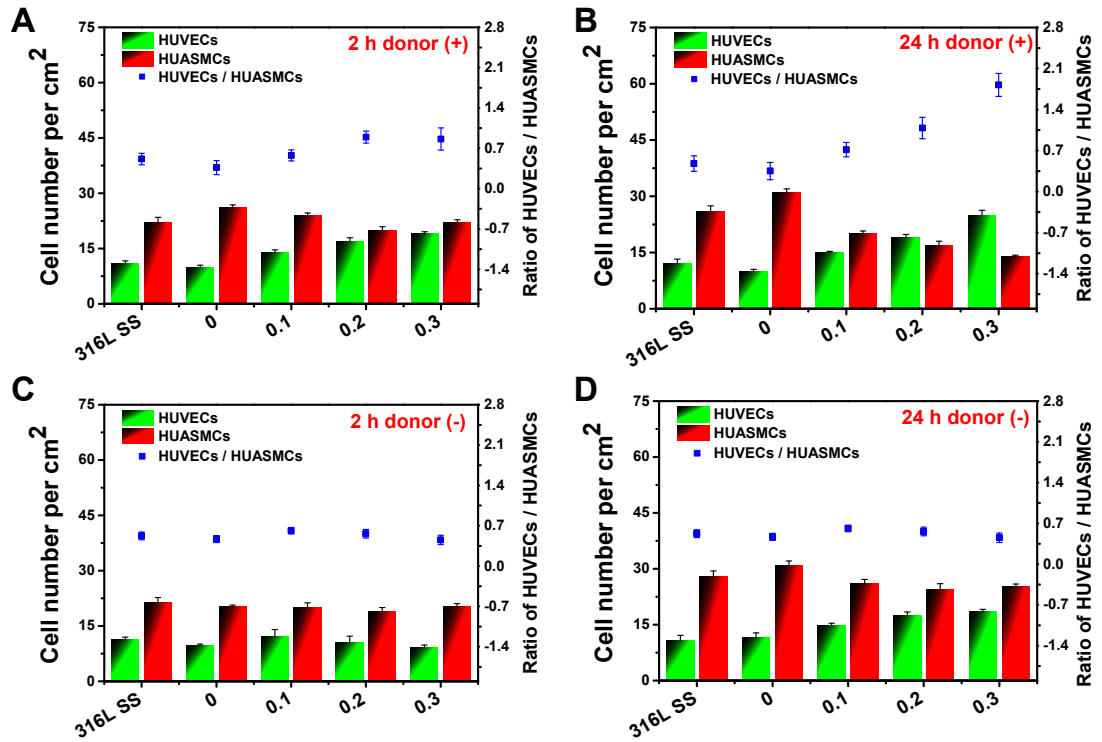

**Fig. S12** Competitive adhesion between HUVECs and HUASMCs on different samples after 2 and 24 h of culture in both the presence and absence of NO donor. The figure shows the number of HUVECs and HUASMCs, and the ratio of the two cells, respectively.

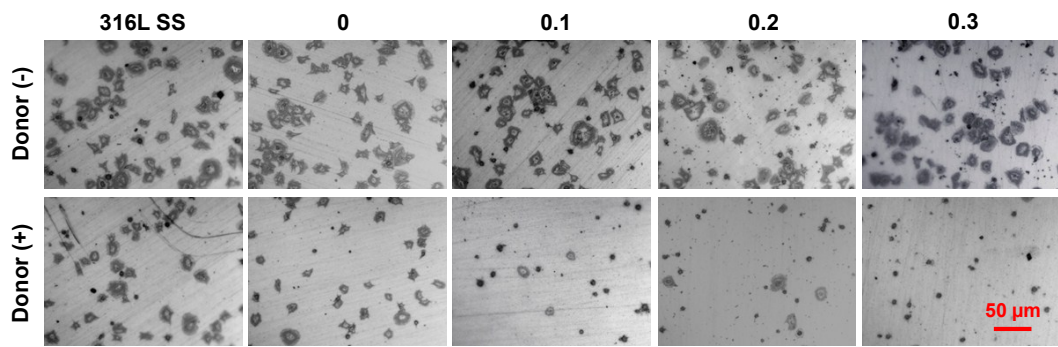

**Fig. S13** Optical microscope images of the platelets adhered on different surfaces after culture in PRP without and with NO donor (10  $\mu$ M GSNO, 10  $\mu$ M GSH) for 15 min.

**Table S1.** Atomic compositions of the Cu<sup>II</sup>-DA coatings fabricated using different feeding concentration of CuCl<sub>2</sub>·2H<sub>2</sub>O.

| Feeding concentration<br>of CuCl <sub>2</sub> ·2H <sub>2</sub> O (mg/mL) | Content [at.%] |     |      |     |
|--------------------------------------------------------------------------|----------------|-----|------|-----|
|                                                                          | C              | N   | O    | Cu  |
| 0                                                                        | 81.7           | 5.9 | 12.4 | 0   |
| 0.1                                                                      | 73.6           | 6.8 | 18.6 | 1.1 |
| 0.2                                                                      | 73.7           | 6.1 | 18.8 | 1.4 |
| 0.3                                                                      | 73.3           | 7.2 | 17.8 | 1.7 |
